# Supplementary material for: Bilayer architecture based on hexanuclear heterometal cluster units
Source: Royal Society of Chemistry journal article supplement (doi:10.1039/c4ce00747f), 2014-01-01
Supplement: c4ce00747f1.pdf [file c4ce00747f1.pdf]

## Supporting Information

### Bilayer architecture based on heterometallic hexanuclear units

Wei-Hui Fang,<sup>[a]</sup> and Guo-Yu Yang\*<sup>[a]</sup>

<sup>[a]</sup> State Key Laboratory of Structural Chemistry, Fujian Institute of Research on the Structure of Matter, Chinese Academy of Sciences, Fuzhou, Fujian 350002, China

#### CONTENT

##### Supporting Tables:

[Table S1](#) Selected bond lengths (Å) for compound **1**.

[Table S2](#) BVS for Eu, Cu and hydroxyl oxygen atoms in **1**.

[Table S3](#) Hydrogen bond lengths (Å) and bond angles (°) for compounds **1**.

##### Supporting Figures:

[Fig. S1](#) The ball-stick view of the coordination environment of Eu ion.

[Fig. S2](#) The ball-stick view of the coordination environments of the Cu<sup>II</sup> (up) and Cu<sup>I</sup> (down) in compound **1**.

[Scheme S1](#) The coordination modes of HL ligands and related references.

[Fig. S3](#) Side view shows the thickness of the monolayers along the *b* axis.

[Fig. S4](#) The coordination environment of Eu<sup>III</sup><sub>2</sub>Cu<sup>II</sup><sub>4</sub> core in **1**.

[Fig. S5](#) (a) Supramolecular structure of compound **1**. (b) Emphasized  $\pi$ - $\pi$  interaction.

[Fig. S6](#) The bilayer architecture in **1**'.

[Fig. S7](#) Simulated and experimental PXRD patterns of **1**.

[Fig. S8](#) The IR spectrum of compound **1**.

[Fig. S9](#) TGA curves of compound **1**.

[Fig. S10](#) Solid-state emission spectra of HL and compound **1** at room temperature.

## Supporting Tables:

**Table S1** Selected bond lengths (Å) for compound **1<sup>a</sup>**

|             |          |             |          |
|-------------|----------|-------------|----------|
| Eu-O(1)     | 2.393(7) | Cu(1)-O(9)  | 1.950(7) |
| Eu-O(1W)    | 2.506(9) | Cu(1)-O(10) | 1.932(6) |
| Eu-O(4)     | 2.398(7) | Cu(1)-O(14) | 2.842(3) |
| Eu-O(5)     | 2.361(7) | Cu(2)-N(2)C | 2.010(9) |
| Eu-O(6)A    | 2.483(7) | Cu(2)-O(2)  | 1.971(7) |
| Eu-O(7)     | 2.374(8) | Cu(2)-O(6)A | 2.502(7) |
| Eu-O(8)A    | 2.468(7) | Cu(2)-O(9)  | 1.972(7) |
| Eu-O(10)    | 2.409(7) | Cu(2)-O(10) | 1.936(6) |
| Cu(1)-N(1)B | 1.982(8) | Cu(2)-O(13) | 2.557(2) |
| Cu(1)-O(3)  | 1.976(7) | Cu(3)-N(3)  | 2.036(1) |
| Cu(1)-O(8)A | 2.506(7) | Cu(3)-N(4)D | 2.030(5) |

<sup>a</sup> Symmetry transformations used to generate equivalent atoms: A:  $-x+2, -y+1, -z$ ; B:  $x, y-1, z$ ; C:  $x, y, z-1$ ; D:  $x, y-1, z+1$ .

**Table S2** BVS for Eu, Cu and hydroxyl oxygen atoms in **1<sup>a</sup>**

| Atom | BVS  |
|------|------|
| Eu   | 2.84 |
| Cu1  | 1.95 |
| Cu2  | 1.95 |
| Cu3  | 0.64 |
| O9   | 0.85 |
| O10  | 1.37 |

<sup>a</sup>  $BVS = \exp[(R1-d)/0.37]$

**Table S3** Hydrogen bond lengths (Å) and bond angles (°) for compounds **1<sup>a</sup>**

| D-H...A                     | d(D-H) | d(H...A) | d(D...A) | <DHA  |
|-----------------------------|--------|----------|----------|-------|
| O9-H(0B)...O2W              | 0.90   | 2.29     | 2.87(1)  | 122.4 |
| O10-H(0A)...O3W             | 0.96   | 1.90     | 2.85(2)  | 168.3 |
| O4W-H(42)...O5 <sup>A</sup> | 0.83   | 2.37     | 3.14(1)  | 157.1 |

<sup>a</sup> Symmetry code: A:  $-x+2, -y+1, -z+3$ .

## Supporting Figures:

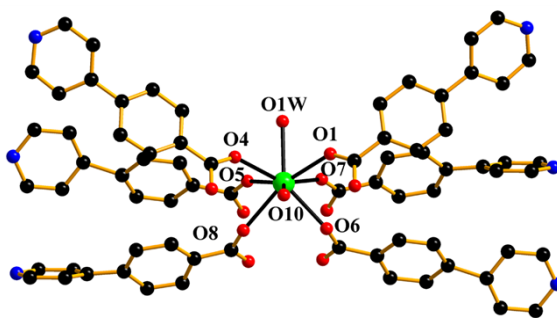

**Fig. S1** The ball-stick view of the coordination environment of Eu ion. Atoms having “A” in their labels are symmetry-generated. Symmetry code A:  $-x+2, -y+1, -z$ .

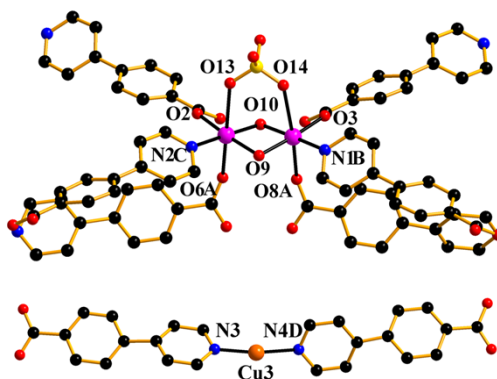

**Fig. S2** The ball-stick view of the coordination environments of the Cu<sup>II</sup> (up) and Cu<sup>I</sup> (down) in compound **1**. Atoms having B-D in their labels are symmetry-generated. Symmetry codes B:  $x, y-1, z$ ; C:  $x, y, z-1$ ; D:  $x, y-1, z+1$ .

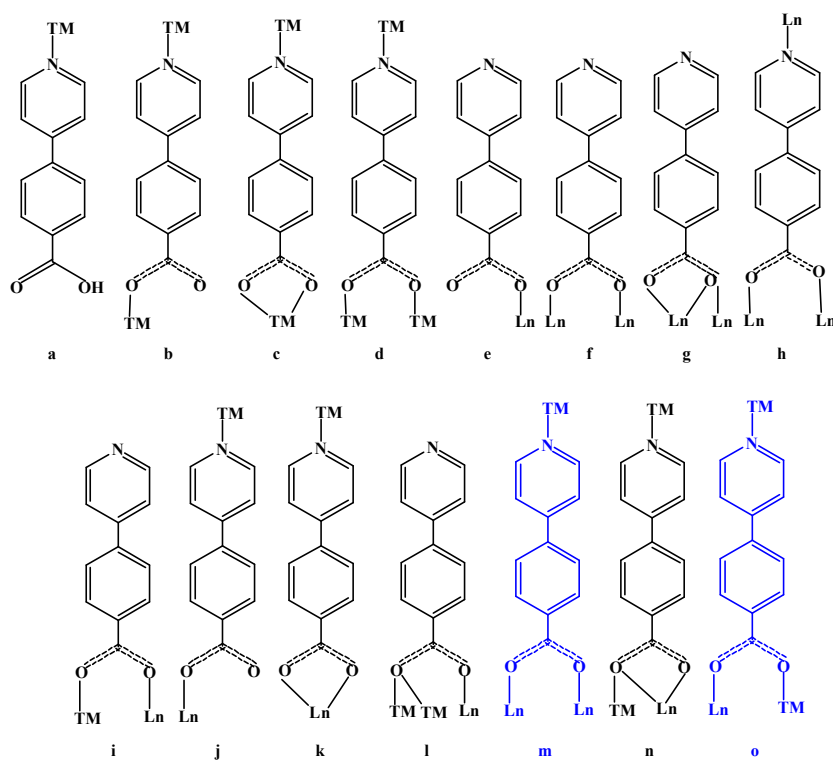

**Scheme S1** The coordination modes of HL ligands and related references.

The mode (a) is seen in the reference 1; The mode (b) is given in the reference 2; The mode (c) is found in the reference

2a,c,3; The mode (d) is seen in the reference 2b,4; The modes (e,i,l,n) are seen in the reference 5; The modes (f-h) are seen in the reference 6; The mode (j) is seen in the reference 7; The mode (k) is seen in the reference 7,8; The mode (m) is seen in the reference 7,9 and herein; The mode (o) is seen in the reference herein.

- (a) R. Sekiya, S. Nishikiori and K. Ogura, *Inorg. Chem.*, 2006, **45**, 9233; (b) R. Sekiya and S. Nishikiori, *Cryst. Growth Des.*, 2011, **11**, 5574; (c) G. C. Ou, J. Z. Gu, T. B. Lu and R. L. Luck, *J. Mol. Struct.*, 2005, **740**, 143; (d) P. Teo, L. L. Koh and T. S. A. Hor, *Inorg. Chem.*, 2008, **47**, 6464; (e) X. L. Jia, J. Zhou, S. T. Zheng and G. Y. Yang, *J. Cluster Sci.*, **2009**, **20**, 555; (f) R. Sekiya and S. Nishikiori, K. Ogura, *Chem. Lett.*, 2006, **35**, 614.
- (a) O. R. Evans and W. B. Lin, *Chem. Mater.*, 2001, **13**, 2705; (b) X. M. Zhang, Y. Q. Wang, Y. Song and E. Q. Gao, *Inorg. Chem.*, 2011, **50**, 7284; (c) T. B. Lu and R. L. Luck, *Inorg. Chim. Acta*, 2003, **351**, 345.
- (a) X. J. Zhou, B. Y. Li, G. H. Li, Q. Zhou, Z. Shi and S. H. Feng, *CrystEngComm*, 2012, **14**, 4664; (b) G. Mehlana, S. A. Bourne and G. Ramon, *Dalton Trans.*, 2012, **41**, 4224; (c) Y. P. He, Y. X. Tan and J. Zhang, *CrystEngComm*, 2012, **14**, 6359.
- (a) Y. B. Zhang, H. L. Zhou, R. B. Lin, C. Zhang, J. B. Lin, J. P. Zhang and X. M. Chen, *Nat. Commun.*, 2012, **3**, 642; (b) M. H. Zeng, Q. X. Wang, Y. X. Tan, S. Hu, H. X. Zhao, L. S. Long and M. Kurmoo, *J. Am. Chem. Soc.*, 2010, **132**, 2561; (c) X. M. Zhang, K. Wang, Y. Q. Wang and E. Q. Gao, *Dalton Trans.*, 2011, **40**, 12742; (d) M. C. Das, H. Xu, S. C. Xiang, Z. J. Zhang, H. D. Arman, G. D. Qian and B. L. Chen, *Chem.-Eur. J.*, 2011, **17**, 7817; (e) Z. Yin, Q. X. Wang and M. H. Zeng, *J. Am. Chem. Soc.*, 2012, **134**, 4857.
- M. B. Zhang, H. M. Chen, R. X. Hu and Z. L. Chen, *CrystEngComm*, 2011, **13**, 7019.
- (a) Z. L. Wang, W. H. Fang and G. Y. Yang, *Chinese. J. Struct. Chem.*, 2009, **28**, 1453; (b) Z. L. Wang, W. H. Fang and G. Y. Yang, *J. Cluster Sci.*, 2009, **20**, 725; (c) W. H. Fang, Z. L. Wang and G. Y. Yang, *J. Cluster Sci.*, 2010, **21**, 187; (d) W. H. Fang, L. Cheng, L. Huang and G. Y. Yang, *Inorg. Chem.*, 2013, **52**, 6.
- W. H. Fang and G. Y. Yang, *CrystEngComm*, 2013, **15**, 9504.
- Z. L. Wang, W. H. Fang and G. Y. Yang, *Chem. Commun.*, 2010, **46**, 8216.
- H. M. Chen, R. X. Hu and M. B. Zhang, *Inorg. Chim. Acta*, 2011, **379**, 34.

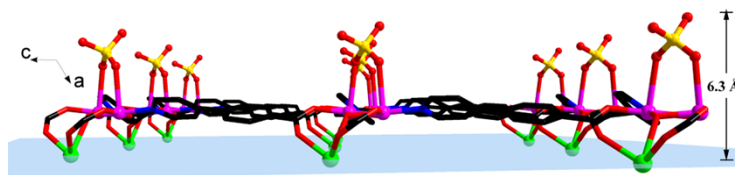

Fig. S3 Side view shows the thickness of the monolayers along the *b* axis.

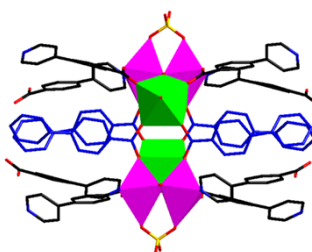

Fig. S4 The coordination environment of Eu<sup>III</sup><sub>2</sub>Cu<sup>II</sup><sub>4</sub> core in **1**. Twelve ligands: four in mode I (blue), eight in mode II (black).

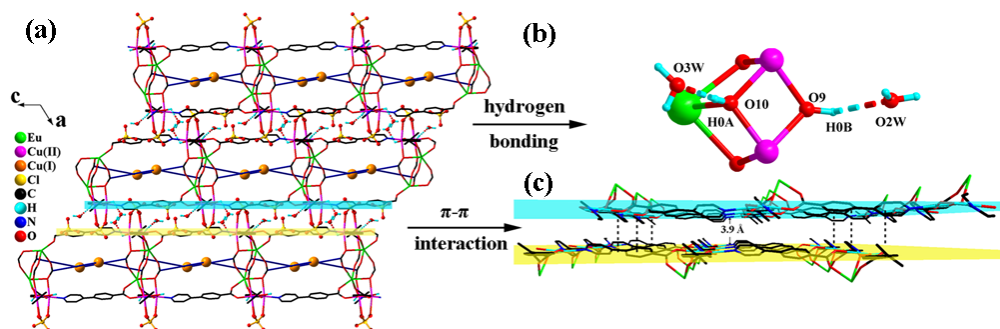

Fig. S5 (a) Supermolecular structure of compound **1**. (b-c) Emphasized hydrogen bonding and π-π interaction. Perchlorate groups are omitted for clarity.

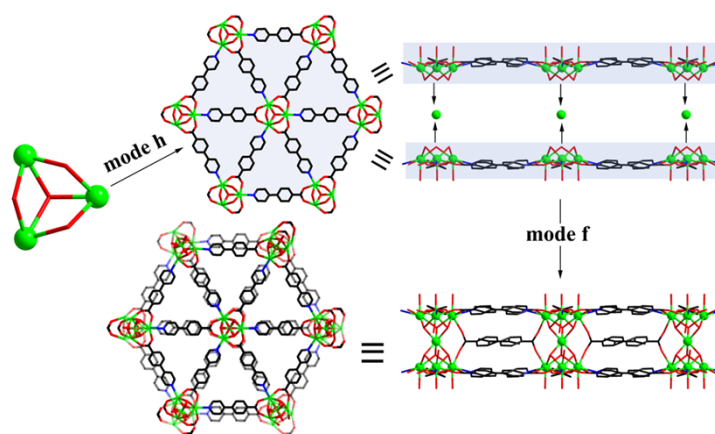

Fig. S6 The bilayer architecture in **1**' (ref. 16).

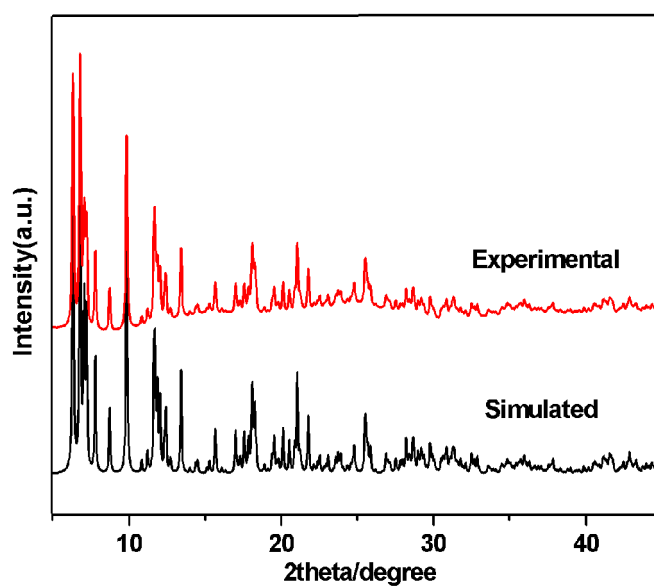

Fig. S7 Simulated and experimental PXRD patterns of **1**.

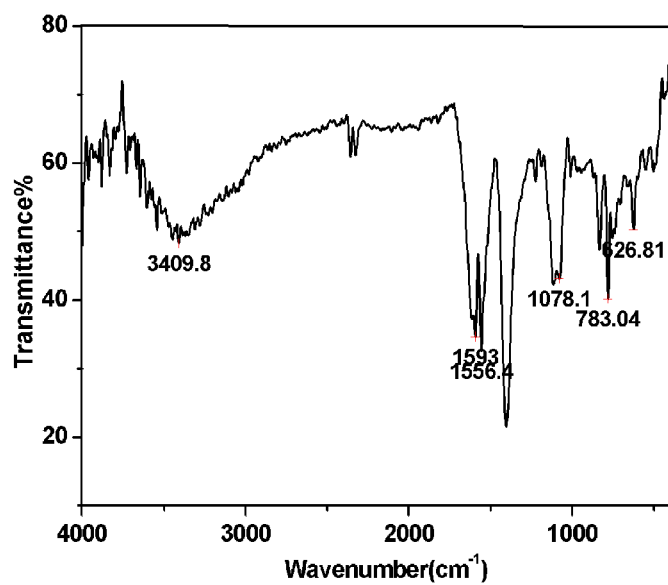

Fig. S8 The IR spectrum of compound **1**.

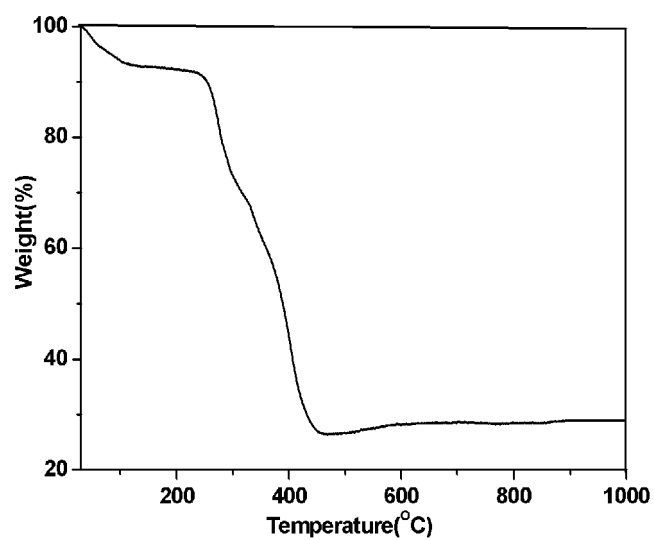

Fig. S9 TGA curve of compound 1.

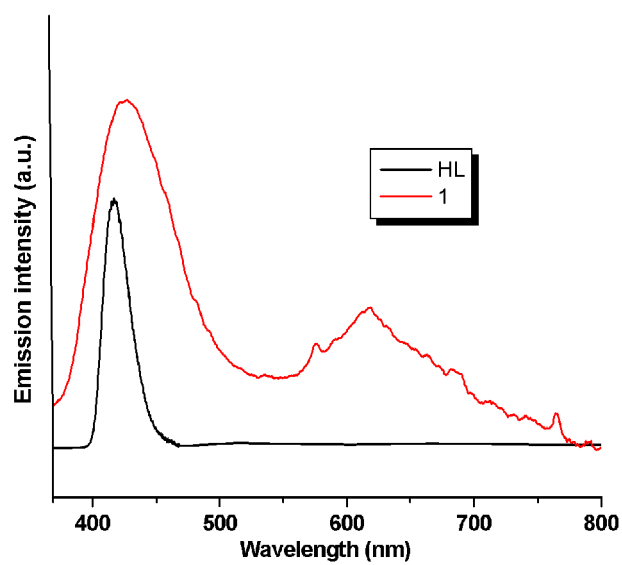

Fig. S10 Solid-state emission spectra of HL and compound 1 at room temperature.
